# Supplementary material for: Pkd1 and Pkd2 Are Required for Normal Placental Development
Source: PubMed Central journal article supplement (PMC2940908; doi:10.1371/journal.pone.0012821), 2010-09-16
Supplement: pone.0012821.s004.pdf [file pone.0012821.s004.pdf]

Table S1: Genotypes resulting from *Pkd1*<sup>+/-</sup> Intercrosses.

| Age (d.p.c.) | <i>Pkd1</i> <sup>+/+</sup> | <i>Pkd1</i> <sup>+/-</sup> | <i>Pkd1</i> <sup>-/-</sup> |
|--------------|----------------------------|----------------------------|----------------------------|
| 9.5          | 4                          | 10                         | 5                          |
| 10.5         | 8                          | 12                         | 7                          |
| 11.5         | 24                         | 39                         | 17                         |
| 12.5         | 30                         | 60                         | 15                         |
| 13.5         | 20                         | 33                         | 11                         |
| 14.5         | 19                         | 32                         | 10                         |
| 15.5         | 28                         | 49                         | 15                         |
| 16.5         | 24                         | 45                         | 4                          |
| 17.5         | 13                         | 30                         | 3 (2 dead)                 |
| 18.5         | 9                          | 15                         | 0                          |
