# Supplementary material for: Pkd1 and Pkd2 Are Required for Normal Placental Development
Source: PubMed Central journal article supplement (PMC2940908; doi:10.1371/journal.pone.0012821), 2010-09-16
Supplement: pone.0012821.s005.pdf [file pone.0012821.s005.pdf]

Table S2: Genotypes resulting from mating of *Pkd2* allele.

**A.**

| Age         | <i>Pkd2</i> <sup>+/+</sup> | <i>Pkd2</i> <sup>lox11-13/+</sup> | <i>Pkd2</i> <sup>lox11-13/lox11-13</sup> | total |
|-------------|----------------------------|-----------------------------------|------------------------------------------|-------|
|             | n (%)                      | n(%)                              | n(%)                                     |       |
| E13.5-E16.5 | 13 (25%)                   | 28 (54%)                          | 11 (21%)                                 | 52    |
| E17.5-E19.5 | 14 (28.5%)                 | 31 (63%)                          | 13 (26%)                                 | 58    |
| After Birth | 31 (32%)                   | 56 (58%)                          | 7 (7%)                                   | 94    |

**B.**

| Age         | <i>Pkd2</i> <sup>+/+</sup> | <i>Pkd2</i> <sup>ΔNeo/+</sup> | <i>Pkd2</i> <sup>ΔNeo / ΔNeo</sup> | total |
|-------------|----------------------------|-------------------------------|------------------------------------|-------|
|             | n (%)                      | n(%)                          | n(%)                               |       |
| E13.5-E16.5 | 7 (23%)                    | 15 (50%)                      | 8 (27%)                            | 30    |
| E17.5-E19.5 | 8 (25%)                    | 15 (46%)                      | 9 (28%)                            | 32    |
| After Birth | 59 (23%)                   | 133 (52%)                     | 62 (24%)                           | 254   |

**C.**

| Age         | <i>Pkd2</i> <sup>+/+</sup> | <i>Pkd2</i> <sup>Δ11-13/+</sup> | <i>Pkd2</i> <sup>Δ11-13/ Δ11-13</sup> | total |
|-------------|----------------------------|---------------------------------|---------------------------------------|-------|
|             | n (%)                      | n(%)                            | n(%)                                  |       |
| E10.5-E12.5 | 8 (24%)                    | 18 (55%)                        | 7 (21%)                               | 33    |
| E13.5-E14.5 | 15 (21%)                   | 39 (54%)                        | 18 (25%)                              | 72    |
| E15.5-E16.5 | 35 (28%)                   | 67 (54%)                        | 22 (18%)                              | 124   |
| E17.5-E19.5 | 18 (31%)                   | 37 (63%)                        | 3 (5%)                                | 58    |
| After Birth | 49 (32%)                   | 104 (68%)                       | 0 (0%)                                | 153   |
